# Supplementary material for: Syntheses, structures, and luminescence properties of four metal–organic polymers with undocumented topologies constructed from 3,5-bis((4′-carboxylbenzyl)oxy)benzoate ligand
Source: Royal Society of Chemistry journal article supplement (doi:10.1039/c4ra04707a), 2014-01-01
Supplement: c4ra04707a1.pdf [file c4ra04707a1.pdf]

*Electronic Supplementary Information (ESI) for*

## **Syntheses, Structures, and Luminescence Properties of Four Metal-Organic Polymers With Undocumented Topologies Constructed From 3,5-Bis((4'- carboxylbenzyl)oxy)benzoate Ligand**

Xiutang Zhang,<sup>\*a,b</sup> Liming Fan,<sup>b</sup> Weikuo Song,<sup>a</sup> Weiliu Fan,<sup>b</sup> Liming Sun,<sup>b</sup> Xian Zhao<sup>\*b</sup>

<sup>a</sup>Advanced Material Institute of Research, College of Chemistry and Chemical Engineering, Qilu Normal University, Jinan,

250013, China. <sup>b</sup>State Key Laboratory of Crystal Materials, Shandong University, Jinan 250100, China.

E-mail: xiutangzhang@163.com; zhaoxian@icm.sdu.edu.cn.

ESI

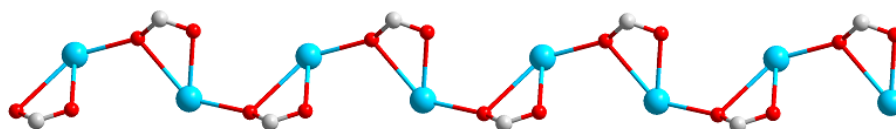

**Figure S1.** The 1D [Cd(COO)]<sub>n</sub> chain in complex **2**.

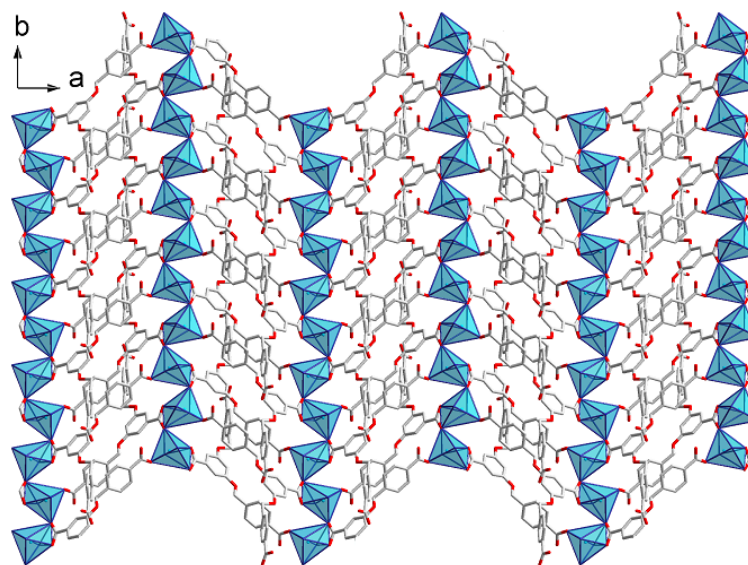

**Figure S2.** The 2D [Cd(Hbcb)]<sub>n</sub> layer in complex **2**.

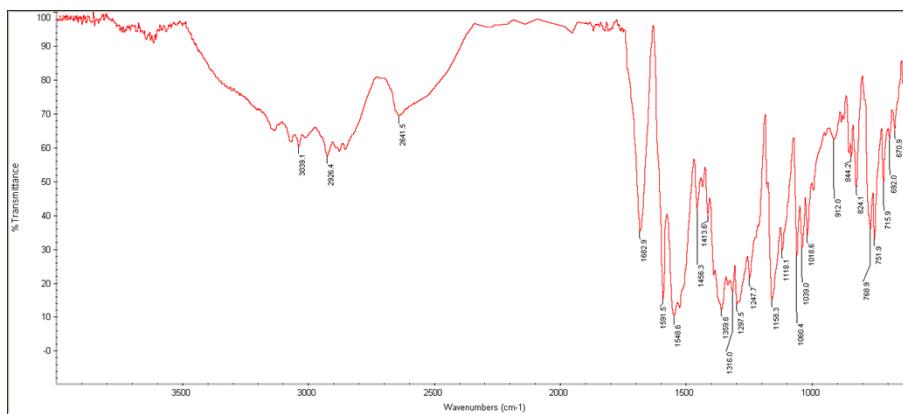

(a)

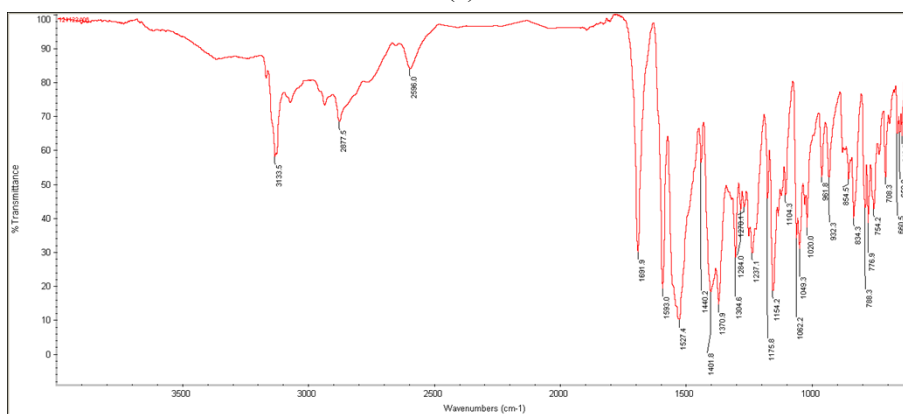

(b)

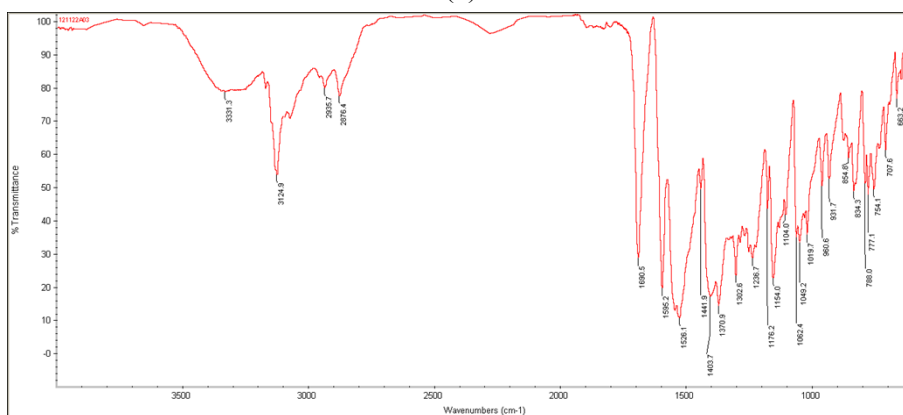

(c)

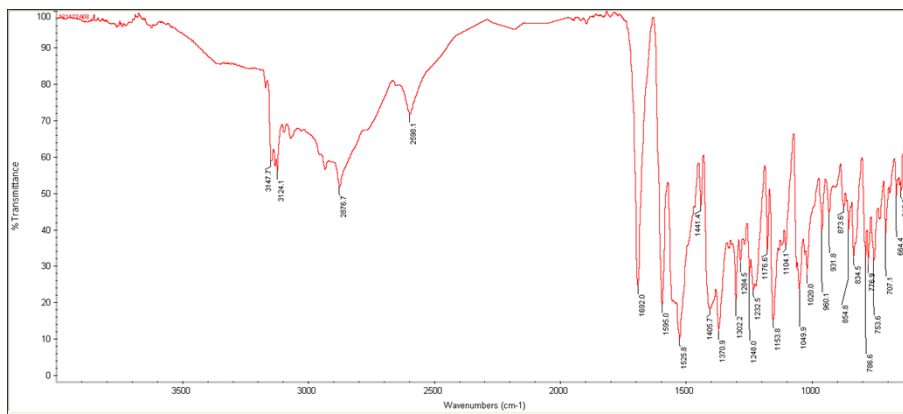

(d)

**Figure S3.** IR spectra of **1** (a), **2** (b), **3** (c), and **4** (d).

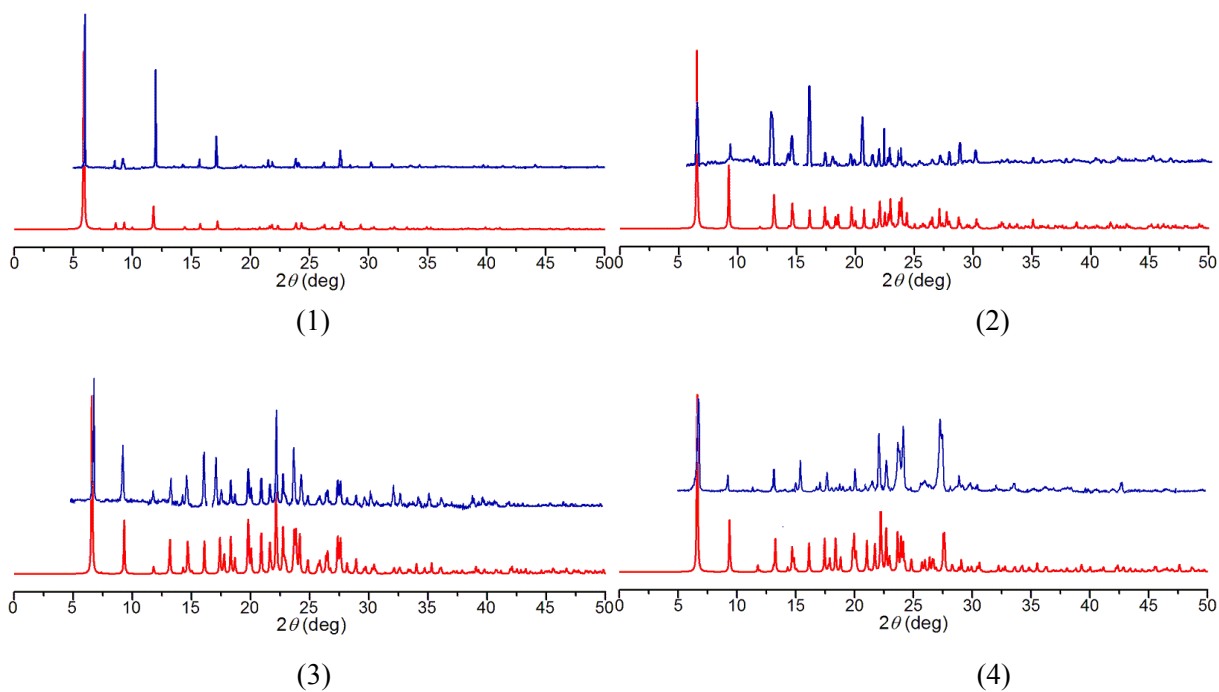

**Figure S4.** PXRD patterns of complexes **1-4**. Red: calculated from the X-ray single-crystal data; Blue: observed for the as-synthesized solids.

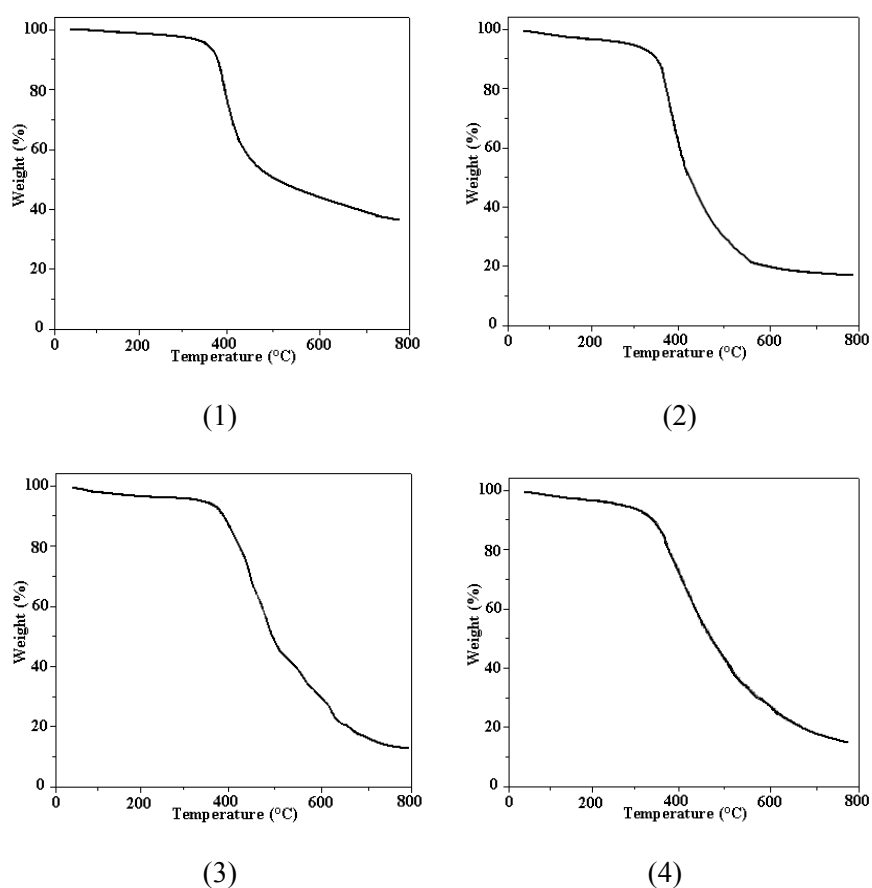

**Figure S5.** TGA curves for complexes **1-4**.
